# Supplementary material
Source: PubMed Central journal article supplement (PMC6949413)
Supplement: NIHMS1542342-supplement-4.pdf [file NIHMS1542342-supplement-4.pdf]

**A**

| CDR3.amino.acid.sequence | # Patients | 106 | 146 | 157 | 229 | 266 | 270 | 271 | 304 | 318 | 363 | 379 | 384 | 394 |
|--------------------------|------------|-----|-----|-----|-----|-----|-----|-----|-----|-----|-----|-----|-----|-----|
| CASSFRFLSGRALNEQFF       | 1          |     |     |     |     |     |     |     |     |     | 2   |     |     |     |
| CSAAGLAGSYNEQFF          | 0          |     |     |     |     |     |     |     |     |     |     |     |     |     |
| CSAPSGGLYEQYF            | 0          |     |     |     |     |     |     |     |     |     |     |     |     |     |
| CASSQDRGNQPQHF           | 0          |     |     |     |     |     |     |     |     |     |     |     |     |     |
| CASKDRYEQYF              | 0          |     |     |     |     |     |     |     |     |     |     |     |     |     |
| CASSLDSNQPHF             | 1          |     |     |     |     |     |     |     |     |     |     | 1   |     |     |
| CASSSGTSGYEQYF           | 0          |     |     |     |     |     |     |     |     |     |     |     |     |     |
| CASSDGNTEAFF             | 0          |     |     |     |     |     |     |     |     |     |     |     |     |     |
| CASSLTGNYGYTF            | 0          |     |     |     |     |     |     |     |     |     |     |     |     |     |
| CASSGTGNQPQHF            | 0          |     |     |     |     |     |     |     |     |     |     |     |     |     |
| CASSLGPGNTEAFF           | 0          |     |     |     |     |     |     |     |     |     |     |     |     |     |
| CASSLEQYNSPLHF           | 0          |     |     |     |     |     |     |     |     |     |     |     |     |     |
| CASSGGNTGELFF            | 0          |     |     |     |     |     |     |     |     |     |     |     |     |     |
| CASSYGDKYEQYF            | 0          |     |     |     |     |     |     |     |     |     |     |     |     |     |
| CASRRDRGPYEQYF           | 1          |     |     |     |     |     |     | 53  |     |     |     |     |     |     |
| CSARNTEAFF               | 0          |     |     |     |     |     |     |     |     |     |     |     |     |     |
| CASSQAGMNTEAFF           | 0          |     |     |     |     |     |     |     |     |     |     |     |     |     |
| CASSGQGYGYTF             | 1          |     |     |     |     |     |     |     |     |     |     |     | 3   |     |
| CASSLRAENTEAFF           | 0          |     |     |     |     |     |     |     |     |     |     |     |     |     |

**B**

| CDR3.amino.acid.sequence | # Patients | 106 | 146 | 157 | 229 | 266 | 270 | 271 | 304 | 318 | 363 | 379 | 384 | 394 |
|--------------------------|------------|-----|-----|-----|-----|-----|-----|-----|-----|-----|-----|-----|-----|-----|
| CASSFRFLSGRALNEQFF       | 2          |     |     |     | 95  |     | 1   |     |     |     |     |     |     |     |
| CSAAGLAGSYNEQFF          | 1          |     |     |     | 1   |     |     |     |     |     |     |     |     |     |
| CSAPSGGLYEQYF            | 1          |     |     |     | 19  |     |     |     |     |     |     |     |     |     |
| CASSQDRGNQPQHF           | 4          |     |     | 1   | 2   |     | 57  |     | 1   |     |     |     |     |     |
| CASKDRYEQYF              | 1          |     |     |     | 2   |     |     |     |     |     |     |     |     |     |
| CASSLDSNQPHF             | 6          |     | 4   |     | 2   | 4   | 4   |     |     |     |     | 7   | 1   |     |
| CASSSGTSGYEQYF           | 1          |     |     |     |     |     |     |     |     |     |     | 1   |     |     |
| CASSDGNTEAFF             | 0          |     |     |     |     |     |     |     |     |     |     |     |     |     |
| CASSLTGNYGYTF            | 7          | 5   | 1   |     | 3   | 2   |     | 1   |     | 1   |     | 5   |     |     |
| CASSGTGNQPQHF            | 4          |     |     |     | 4   | 7   |     | 3   | 6   |     |     |     |     |     |
| CASSLGPGNTEAFF           | 1          |     |     |     |     | 1   |     |     |     |     |     |     |     |     |
| CASSLEQYNSPLHF           | 1          |     |     | 2   |     |     |     |     |     |     |     |     |     |     |
| CASSGGNTGELFF            | 2          |     |     |     |     |     | 1   |     |     |     |     | 1   |     |     |
| CASSYGDKYEQYF            | 0          |     |     |     |     |     |     |     |     |     |     |     |     |     |
| CASRRDRGPYEQYF           | 3          |     | 2   |     |     |     | 1   | 97  |     |     |     |     |     |     |
| CSARNTEAFF               | 1          |     | 2   |     |     |     |     |     |     |     |     |     |     |     |
| CASSQAGMNTEAFF           | 2          |     |     |     |     |     |     |     | 1   |     |     |     |     | 1   |
| CASSGQGYGYTF             | 3          |     |     | 1   |     |     | 3   |     |     |     |     |     |     | 2   |
| CASSLRAENTEAFF           | 1          |     |     |     |     |     |     |     |     | 1   |     |     |     |     |
