# Supplementary material
Source: PubMed Central journal article supplement (PMC6949413)
Supplement: NIHMS1542342-supplement-9.pdf [file NIHMS1542342-supplement-9.pdf]

### Reactive

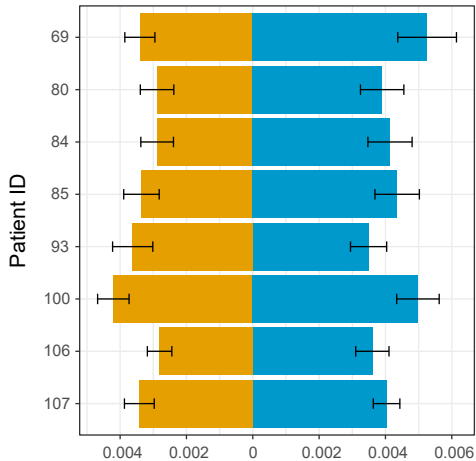

Proportion of total unique CDR3s in Teff or Treg

### Hyporeactive

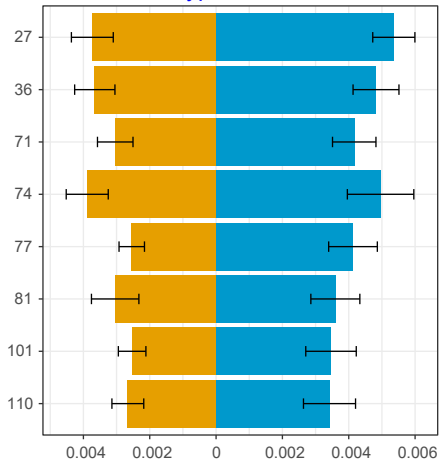

CD154<sup>+</sup> Teff  
CD154<sup>+</sup> Treg
