# Supplementary material
Source: PubMed Central journal article supplement (PMC6949413)

**A**Top DEG in **Reactive**Top DEG in **Hyporeactive**

| Gene ID | Expr. in Act. | FC Act. vs Rest. | Adj. p-value |
|---------|---------------|------------------|--------------|
| IL3     | 397           | 1110             | 8.5E-18      |
| IL17F   | 8185          | 1055             | 1.4E-62      |
| IL31    | 587           | 976              | 2.6E-25      |
| IL9     | 2560          | 687              | 1.1E-45      |
| IL2     | 1931          | 616              | 6.9E-41      |
| CSF2    | 2322          | 585              | 5.3E-101     |
| IL17A   | 1224          | 581              | 8.7E-40      |
| IL22    | 3836          | 572              | 7.5E-47      |
| IL5     | 1632          | 321              | 2.1E-31      |
| IL4     | 349           | 190              | 5.7E-15      |
| ACOXL   | 52            | 183              | 2.3E-23      |
| IL10    | 1361          | 179              | 3.4E-21      |
| IL13    | 2095          | 163              | 9.4E-21      |

| Gene ID | Expr. in Act. | FC Act. vs Rest. | Adj. p-value |
|---------|---------------|------------------|--------------|
| IL17F   | 3540          | 1206             | 2.3E-44      |
| CSF2    | 1500          | 780              | 2.6E-81      |
| IL3     | 89            | 744              | 5.7E-13      |
| IL17A   | 2063          | 582              | 2.3E-43      |
| IL9     | 218           | 450              | 4.8E-06      |
| IL31    | 122           | 338              | 7.4E-10      |
| IL22    | 1068          | 324              | 3.7E-16      |
| IL2     | 1743          | 296              | 3.5E-43      |
| IL5     | 255           | 172              | 5.1E-09      |
| LIF     | 713           | 166              | 3.5E-22      |
| IL13    | 559           | 163              | 1.4E-17      |
| IL4     | 104           | 154              | 1.3E-14      |
| IL10    | 1247          | 129              | 1.4E-12      |

**B**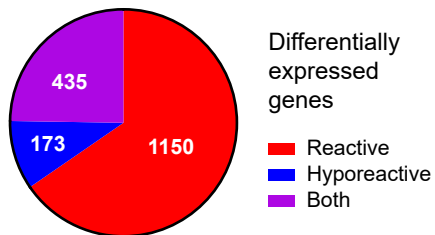

Supplement: NIHMS1542342-supplement-10.pdf [file NIHMS1542342-supplement-10.pdf]
