# Supplementary material
Source: PubMed Central journal article supplement (PMC6949413)
Supplement: NIHMS1542342-supplement-14.pdf [file NIHMS1542342-supplement-14.pdf]

**A**

| Reactive patients | Age | Gender | Cumulative          |                            |                            | RNaseq CD154+/- | Co-cultures               |   | TCRB Seq CD154+/- | TCRB Seq Teff, Treg |
|-------------------|-----|--------|---------------------|----------------------------|----------------------------|-----------------|---------------------------|---|-------------------|---------------------|
|                   |     |        | Eliciting Dose (mg) | Skin prick test wheal (mm) | Peanut-specific IgE (kU/L) |                 | Monocytes, Memory T cells |   |                   |                     |
| 1                 | 16  | M      | 443                 | 10                         | 66                         | •               |                           |   |                   |                     |
| 3                 | 16  | F      | 443                 | 12                         | 800                        |                 | •                         |   |                   |                     |
| 5                 | 20  | F      | 443                 | 9                          | 265                        | •               | •                         |   |                   |                     |
| 19                | 16  | M      | 443                 | 6                          | 65                         | •               | •                         |   |                   |                     |
| 22                | 19  | F      | 443                 | 14                         | 148                        | •               | •                         |   |                   |                     |
| 24                | 36  | M      | 443                 | 5                          | 25                         |                 | •                         |   |                   |                     |
| 29                | 28  | M      | 143                 | 18                         | 22                         | •               | •                         |   |                   |                     |
| 32                | 29  | F      | 43                  | 12                         | 27                         |                 | •                         |   |                   |                     |
| 33                | 16  | F      | 443                 | 10                         | 84                         | •               | •                         |   |                   |                     |
| 34                | 30  | F      | 143                 | 11                         | 79                         |                 | •                         |   |                   |                     |
| 50                | 15  | M      | 443                 | 14                         | 215                        | •               |                           |   |                   |                     |
| 51                | 15  | F      | 443                 | 5                          | 61                         | •               |                           |   |                   |                     |
| 53                | 13  | M      | 443                 | 13                         | 122                        | •               |                           |   |                   |                     |
| 60                | 40  | F      | 443                 | 18                         | 49                         | •               |                           |   |                   |                     |
| 61                | 27  | F      | 443                 | 8                          | 36                         |                 | •                         |   |                   |                     |
| 69                | 15  | M      | 443                 | 13                         | 11                         |                 |                           | • | •                 |                     |
| 73                | 22  | M      | 143                 | 11                         | 145                        |                 | •                         |   |                   |                     |
| 80                | 8   | F      | 443                 | 20                         | 320                        |                 |                           | • | •                 |                     |
| 84                | 22  | M      | 443                 | 11                         | 61                         |                 |                           | • | •                 |                     |
| 85                | 9   | M      | 443                 | 25                         | 151                        |                 |                           | • | •                 |                     |
| 89                | 8   | F      | 443                 | 7                          | 88                         |                 |                           | • |                   |                     |
| 93                | 11  | M      | 143                 | 7                          | 41                         |                 |                           | • | •                 |                     |
| 95                | 8   | M      | 143                 | 24                         | 451                        |                 | •                         |   |                   |                     |
| 100               | 22  | F      | 443                 | 20                         | 396                        |                 |                           | • | •                 |                     |
| 104               | 8   | M      | 143                 | 25                         | 432                        |                 |                           | • |                   |                     |
| 106               | 32  | F      | 143                 | 10                         | 5                          |                 |                           | • | •                 |                     |
| 107               | 22  | F      | 443                 | 22                         | 27                         |                 |                           | • | •                 |                     |

**B**

| Hyporeactive patients | Age | Gender | Cumulative          |                            |                            | RNaseq CD154+/- | Co-cultures               |   | TCRB Seq CD154+/- | TCRB Seq Teff, Treg |
|-----------------------|-----|--------|---------------------|----------------------------|----------------------------|-----------------|---------------------------|---|-------------------|---------------------|
|                       |     |        | Eliciting Dose (mg) | Skin prick test wheal (mm) | Peanut-specific IgE (kU/L) |                 | Monocytes, Memory T cells |   |                   |                     |
| 8                     | 20  | M      | >443                | 12                         | 44                         | •               |                           |   |                   |                     |
| 16                    | 17  | F      | >443                | 5                          | 2                          | •               | •                         |   |                   |                     |
| 27                    | 28  | M      | 3440                | 14                         | 7                          | •               | •                         | • | •                 |                     |
| 28                    | 26  | F      | >443                | 17                         | 3                          |                 | •                         |   |                   |                     |
| 30                    | 22  | M      | >443                | 10                         | 1                          | •               | •                         |   |                   |                     |
| 36                    | 26  | M      | >443                | 13                         | 51                         | •               | •                         | • | •                 |                     |
| 42                    | 53  | M      | >443                | 5                          | 17                         | •               | •                         |   |                   |                     |
| 44                    | 25  | M      | 7440                | 12                         | 1                          |                 | •                         |   |                   |                     |
| 52                    | 13  | M      | 3440                | 0                          | 7                          | •               |                           |   |                   |                     |
| 57                    | 26  | F      | >443                | 12                         | 1                          | •               |                           |   |                   |                     |
| 59                    | 17  | M      | >443                | 12                         | 360                        | •               | •                         |   |                   |                     |
| 62                    | 37  | F      | >443                | 12                         | 4                          | •               | •                         |   |                   |                     |
| 71                    | 13  | M      | >443                | 4                          | 6                          |                 | •                         | • | •                 |                     |
| 74                    | 14  | F      | >443                | 8                          | 5                          |                 |                           | • | •                 |                     |
| 77                    | 17  | M      | >443                | 13                         | 240                        |                 | •                         | • | •                 |                     |
| 81                    | 11  | F      | 1440                | 10                         | 246                        |                 |                           | • | •                 |                     |
| 94                    | 8   | M      | 3440                | 15                         | 74                         |                 |                           | • |                   |                     |
| 98                    | 13  | F      | >443                | 0                          | 8                          |                 |                           | • |                   |                     |
| 101                   | 8   | F      | 1440                | 0                          | 75                         |                 |                           | • | •                 |                     |
| 110                   | 10  | F      | >443                | 6                          | 247                        |                 | •                         | • | •                 |                     |
