# Supplementary material
Source: PubMed Central journal article supplement (PMC6949413)

IL-17A

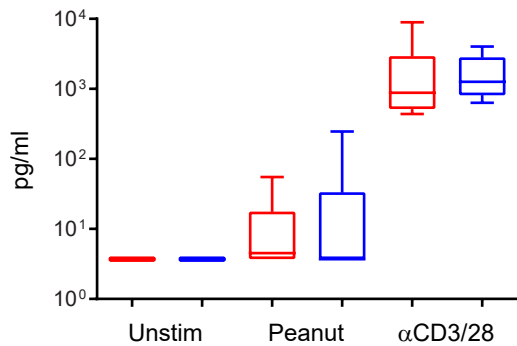

IL-22

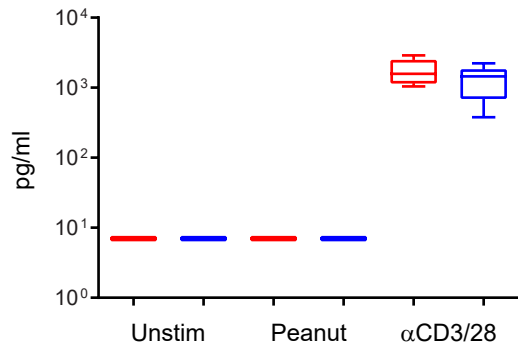

IL-10

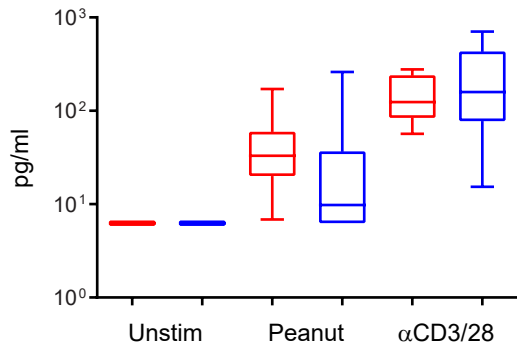IFN- $\gamma$ 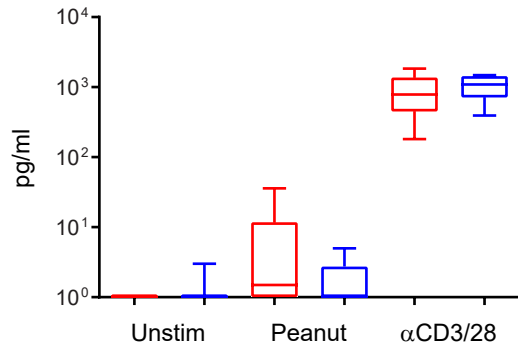

Supplement: NIHMS1542342-supplement-11.pdf [file NIHMS1542342-supplement-11.pdf]

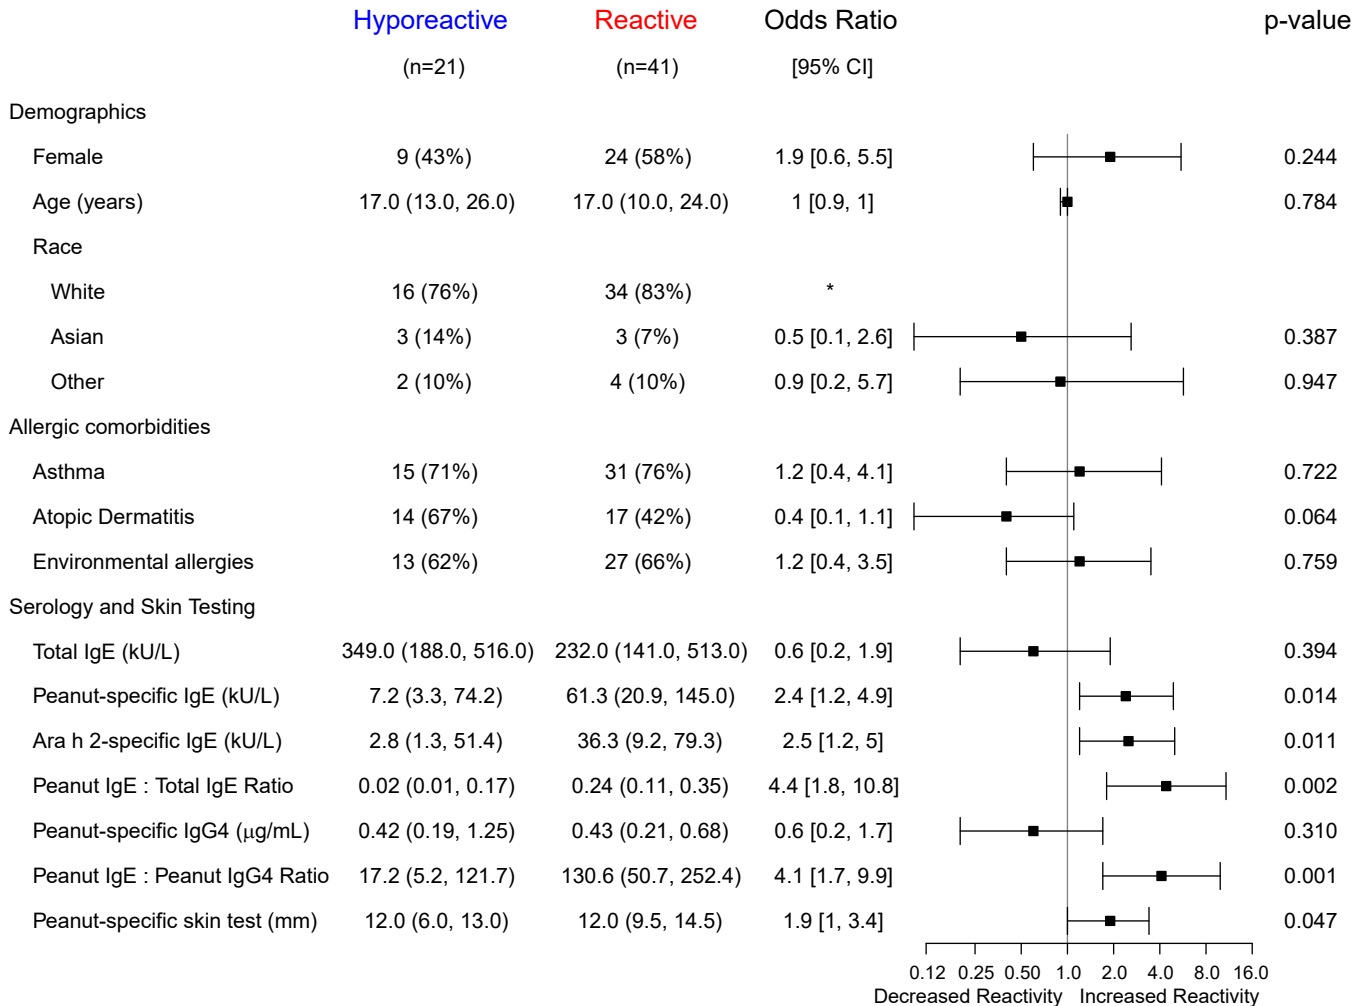

Supplement: NIHMS1542342-supplement-13.pdf [file NIHMS1542342-supplement-13.pdf]

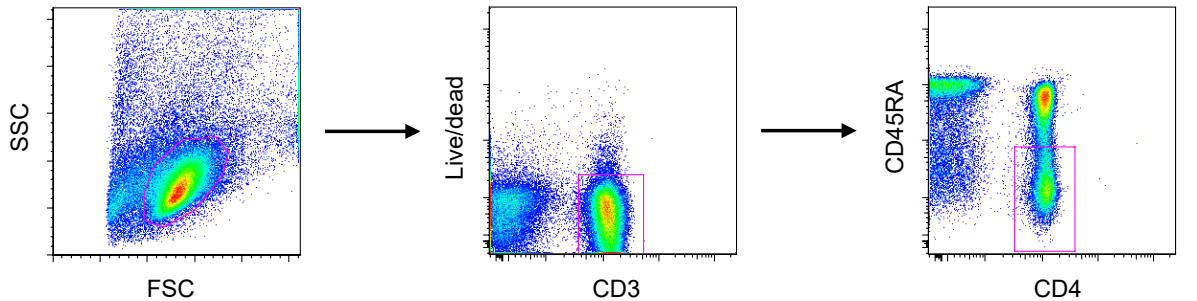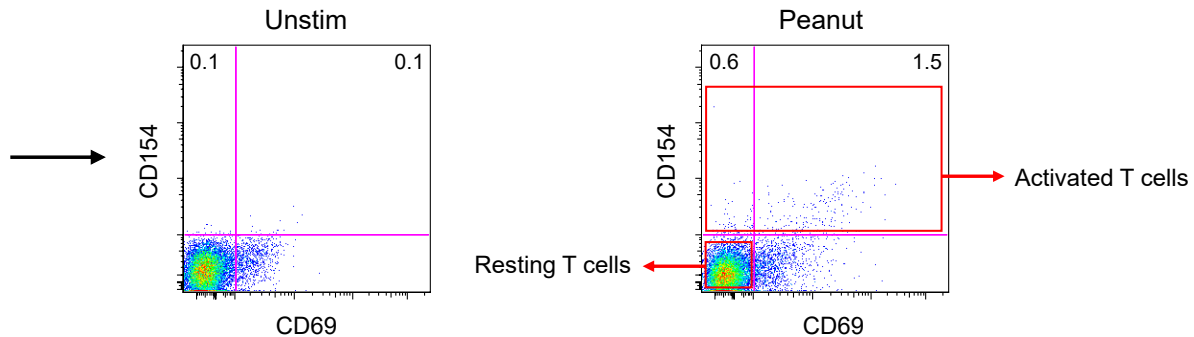

Supplement: NIHMS1542342-supplement-3.pdf [file NIHMS1542342-supplement-3.pdf]

**A**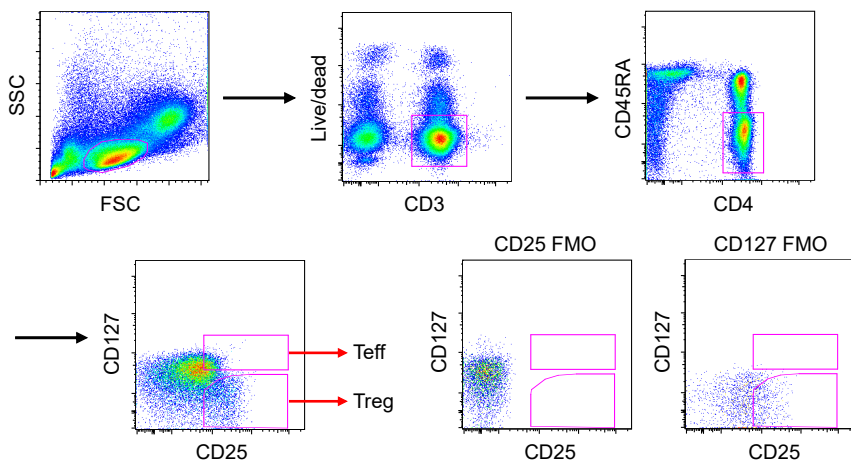**B**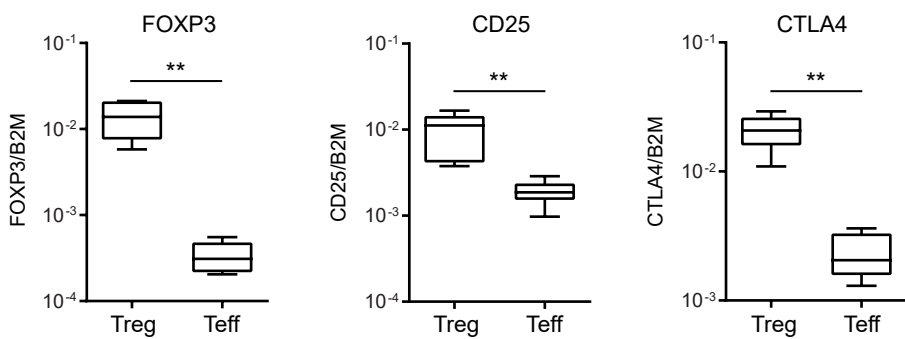**C**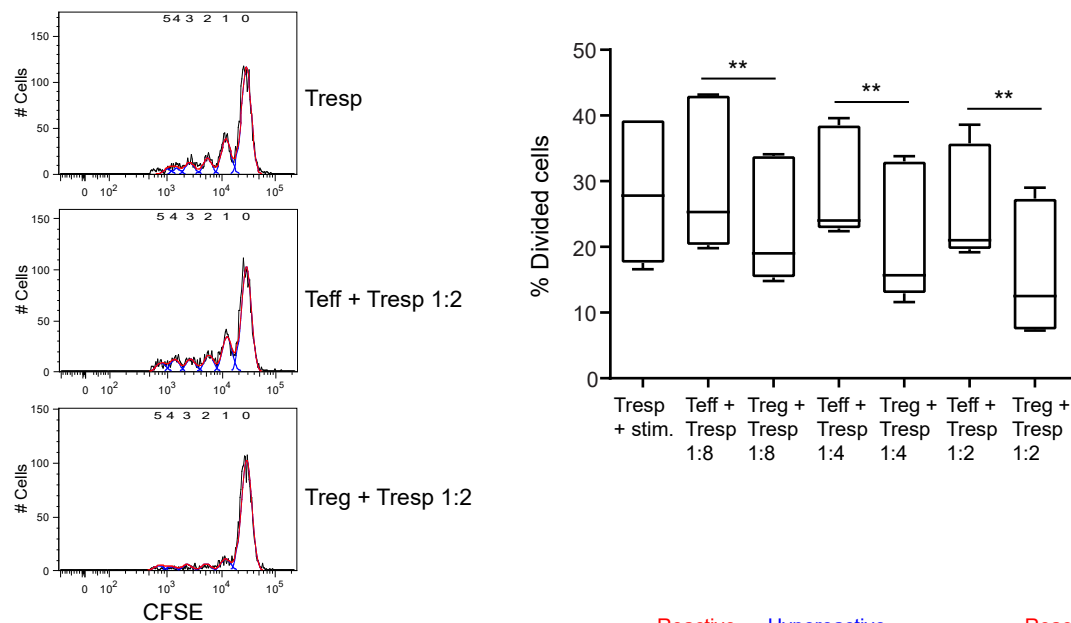**D**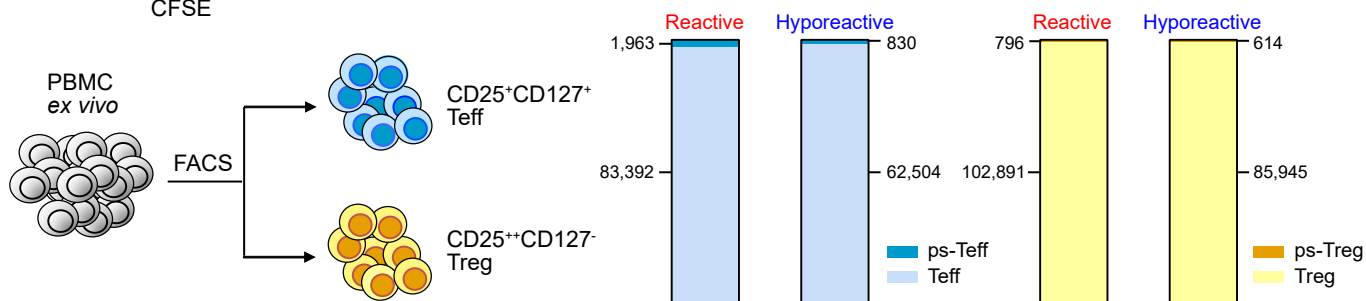

Supplement: NIHMS1542342-supplement-6.pdf [file NIHMS1542342-supplement-6.pdf]

**A**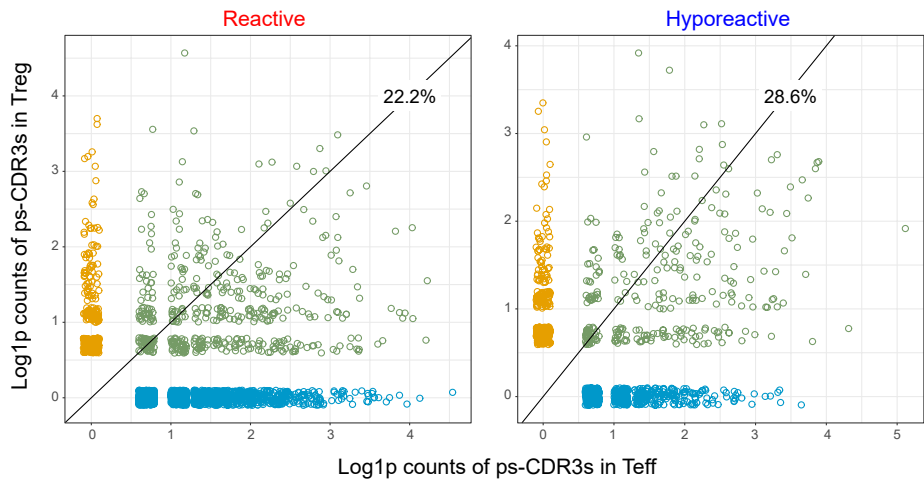**B**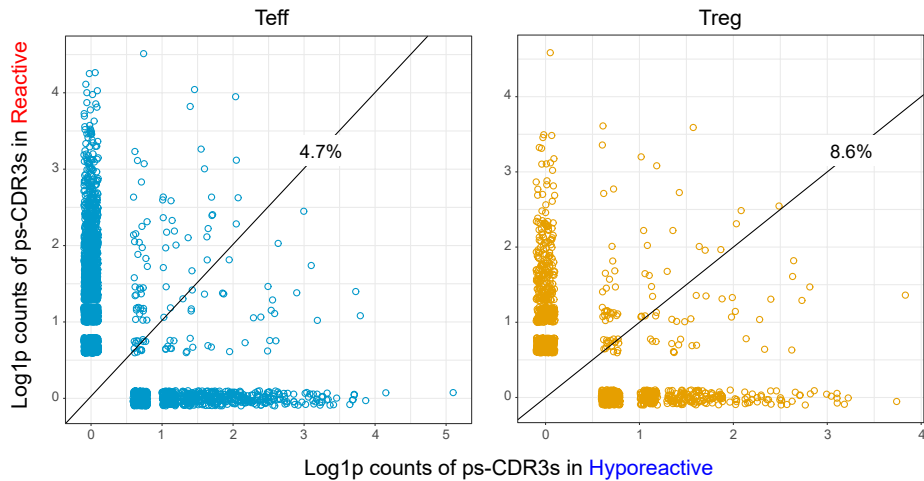

Supplement: NIHMS1542342-supplement-7.pdf [file NIHMS1542342-supplement-7.pdf]

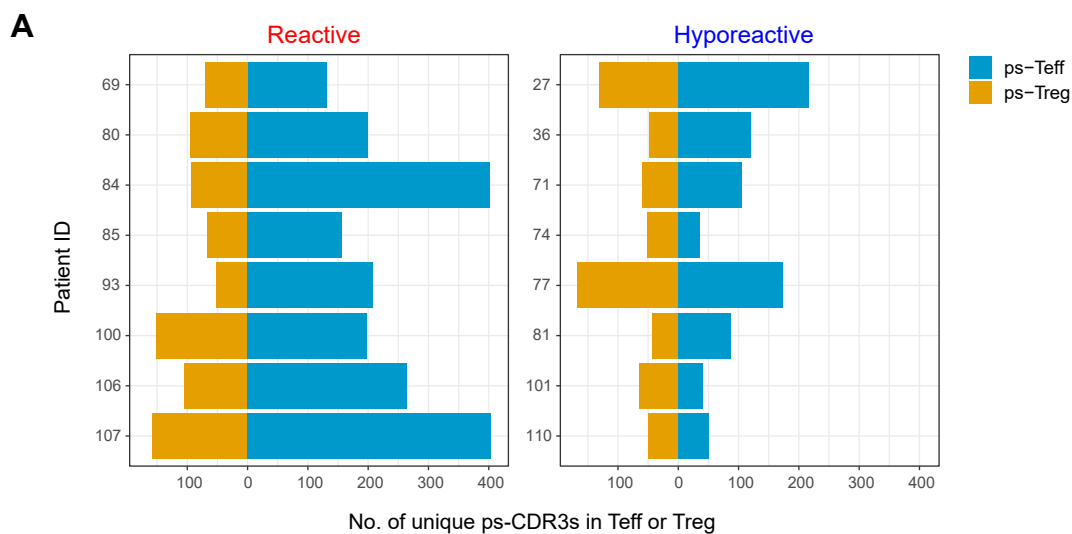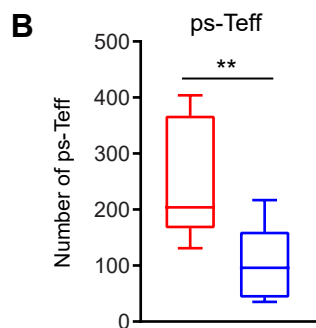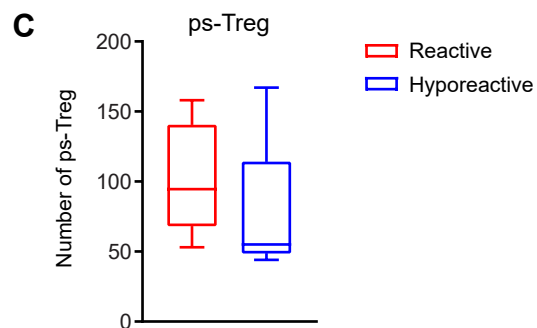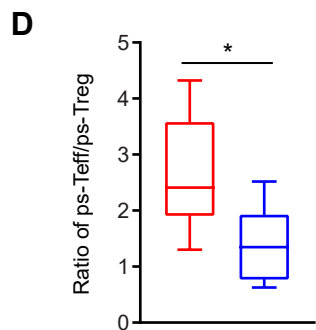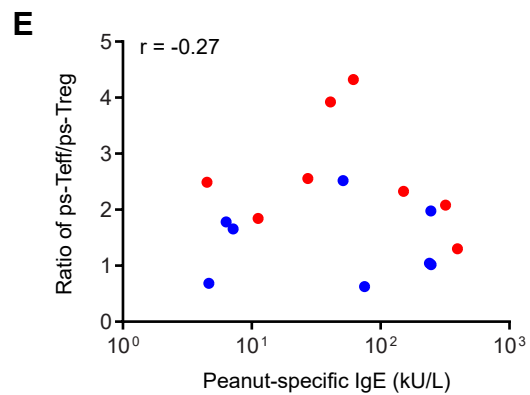

Supplement: NIHMS1542342-supplement-8.pdf [file NIHMS1542342-supplement-8.pdf]
